# Supplementary material for: Blue quantum dot light-emitting diodes with high luminance by improving the charge transfer balance
Source: Royal Society of Chemistry journal article supplement (doi:10.1039/c9cc00230h), 2019-01-01
Supplement: c9cc00230h1.pdf [file c9cc00230h1.pdf]

Electronic Supplementary Information (ESI) for ChemComm.  
This journal is © The Royal Society of Chemistry 2019

## Blue quantum dot light-emitting diodes with high luminance by improving the charge transfer balance

Dongyu Li,<sup>a</sup> Jinke Bai,<sup>b</sup> Tingting Zhang,<sup>a</sup> Chun Chang,<sup>b</sup> Xiao Jin,<sup>a,b,\*</sup> Zhen Huang,<sup>a</sup> Bing Xu<sup>a</sup> and Qinghua Li<sup>a,b,\*</sup>

<sup>a</sup>School of Physics Science and Technology, Lingnan Normal University, Zhanjiang 524048, P. R. China

<sup>b</sup>Jiangxi Engineering Laboratory for Optoelectronics Testing Technology, Nanchang Hangkong University, Nanchang 330063, P. R. China

\*Email: siaojin@163.com; qhli@hqu.edu.cn

### Experimental section

#### Chemicals

Cadmium oxide (CdO, 99.998%), Tributylphosphine (TBP, 98%), tellurium powder (Te, 99.8%), 1-octadecene (1-ODE, 90%), oleic acid (OA, 90%), 1-octadecene (ODE, 90%), sulfur (S, 99.99%, powder), dimethyl sulfoxide (DMSO, 99.7%), TFB(poly[9,9-dioctylfluorene-co-N-[4-(3-methylpropyl)]-diphenylamine]), chlorobenzene(99%), zinc acetate ( $\text{Zn}(\text{Ac})_2$ , 99.99%), tetramethylammoniumhydroxide (TMAH, 97%) and were purchased from Aldrich. poly(3,4-ethylenedioxylenethiophene)-polystyrene sulfonic acid (PEDOT:PSS) and methanol (analytical reagent) were obtained from Sigma-Aldrich. ITO glasses were obtained from Xiamen Weihua. Poly-TPD was purchased from American Dye Source., hexanes (analytical grade), acetone (analytical grade), isopropanol (analytical grade) and methanol (analytical grade) were obtained from Beijing Chemical Reagent Co. Ltd, China.

#### Preparation of $\text{Cd}_{1-x}\text{Zn}_x\text{S}/\text{ZnS}$ core/shell QDs

The synthesis of  $\text{Cd}_{0.1}\text{Zn}_{0.9}\text{S}$  core has been described in our previous work.<sup>1</sup> In a typical synthetic procedure, 0.5 mmol of CdO and 5 mmol  $\text{Zn}(\text{Ac})_2$  were placed in mixture solvent containing 4 mL of OA and 10 mL ODE in 50 mL of 3-neck reactor in 150 °C, degassed under 100 mtorr pressure for 30 min, and then the temperature of the reaction was further heated to 300 °C under  $\text{N}_2$  flow. At this temperature, 0.8 mmol of S powder dissolved in 2 mL of ODE was quickly injected into reaction flask, subsequently, the temperature was elevated to 310 °C for growth of  $\text{Cd}_x\text{Zn}_{1-x}\text{S}$  cores. After the elapse of 8 min of reaction, 7 mmol S powder dissolved in OA (S-OA) were introduced into the reactor to overcoat ZnS shells onto existing  $\text{Cd}_x\text{Zn}_{1-x}\text{S}$  cores. Timing sampling was

taken during the reaction to monitor the development of QDs. The temperature was kept for 1 hour to annealing the QDs and then cooled down to room temperature. Finally, QDs were purified by adding hexane and an excess amount of ethanol (done thrice); then they were redispersed in n-octane or chloroform for further characterization.

### Device fabrication

ZnO and ZnO:Mg nanoparticles were synthesized using the method reported previously.<sup>2</sup> For a typical preparation, a solution of zinc acetate with or without magnesium acetate tetrahydrate in DMSO (0.5 M) and 30 mL of a solution of TMAH in ethanol (0.55 M) were mixed and stirred for 1 h in ambient air, then washed and dispersed in ethanol at a concentration of 30 mg mL<sup>-1</sup>. The spin-coating or evaporation of each layer is the same as our previous work except the TBF layer. The TFB layer was spin-coated at a concentration of 8 mg mL<sup>-1</sup> in chlorobenzene at 3000 rpm for 50 s, and then baked at 150°C for 30 min. The active area of the QLED is 4 mm<sup>2</sup>.

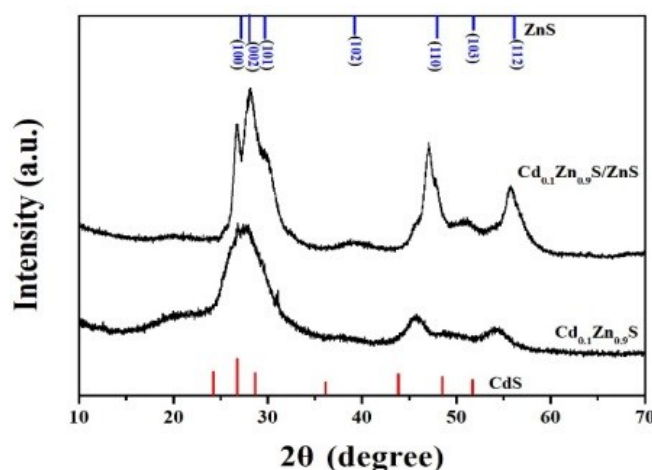

Fig. S1 XRD patterns of the pure Cd<sub>0.1</sub>Zn<sub>0.9</sub>S and Cd<sub>0.1</sub>Zn<sub>0.9</sub>S/ZnS core/shell QDs.

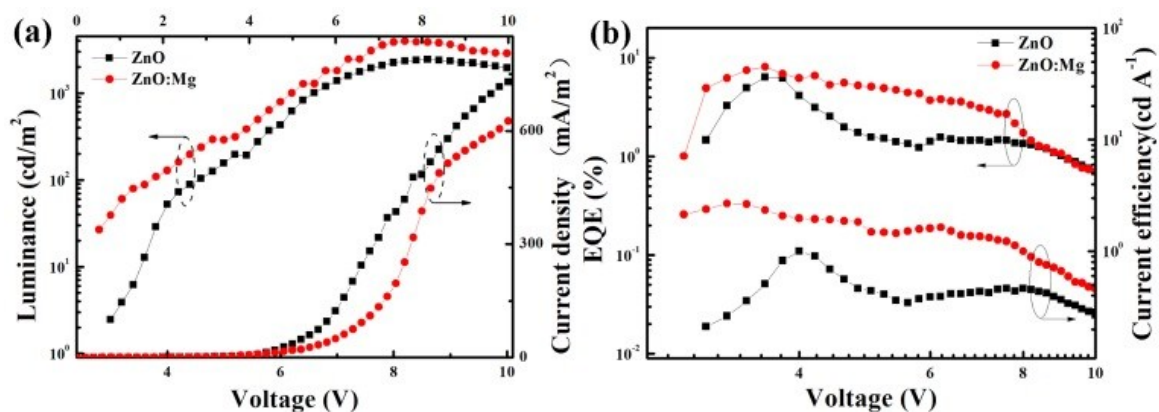

Fig. S2 (a) The current density and Luminance, (b) EQE and current efficiency of ZnO and ZnO:Mg devices.

## References

1. X. Jin, J. Bai, X. Gu, C. Chang, H. Shen, Q. Zhang, F. Li, Z. Chen and Q. Li, *Opt. Mater. Express*, 2017, 7, 4395-4407.
2. S. Wang, Y. Guo, D. Feng, L. Chen, Y. Fang, H. Shen and Z. Du, *J. Mater. Chem. C*, 2017, 5, 4724-4730.
